# Supplementary material
Source: publisher site journal article supplement (https://www.dovepress.com/article/372823)
Supplement: Supplementary file 1 [file get_supplementary_file.php]

**Supplementary Table 1. Comparison of precipitating factors on DEBs between patients and their caregivers**

| **Variables** | **Patients**  **(n=96)** | **Caregivers**  **(n=84)** | ***P* value** |
| --- | --- | --- | --- |
| **Emotion and feelings** | | | |
| Stress | 59 (61.5%) | 56 (66.7%) | 0.468 |
| Anger | 49 (51.0%) | 42 (50.0%) | 0.889 |
| Anxiety | 54 (56.3%) | 47 (56.0%) | 0.968 |
| Depressive mood | 34 (35.4%) | 31 (36.9%) | 0.836 |
| Fatigue | 47 (49.0%) | 52 (61.9%) | 0.082 |
| Pain | 27 (28.1%) | 26 (31.0%) | 0.678 |
| **Food** | | | |
| Alcohol | 22 (22.9%) | 15 (18.1%) | 0.425 |
| Caffeine | 25 (26.0%) | 30 (35.7%) | 0.160 |
| Overeating in the evening | 19 (19.8%) | 18 (21.4%) | 0.786 |
| Fasting/Hunger | 16 (16.7%) | 17 (20.2%) | 0.537 |
| **Activities and sleep patterns** | | | |
| Strenuous exercise | 18 (18.8%) | 21 (25.0%) | 0.310 |
| Sex before bed | 9 (9.4%) | 9 (10.7%) | 0.765 |
| Conflict/fight | 34 (35.4%) | 36 (42.9%) | 0.307 |
| Sleep deprivation | 28 (29.2%) | 33 (39.3%) | 0.152 |
| Oversleeping | 12 (12.5%) | 16 (19.0%) | 0.227 |
| Sleeping away from home | 29 (30.2%) | 21 (25.0%) | 0.436 |
| Watching TV before bed | 44 (45.8%) | 48 (57.1%) | 0.130 |
| **Weather or environmental factor** | | | |
| Cloudy or rainy weather | 17(17.7%) | 13 (15.5%) | 0.688 |
| Heat | 15 (15.6%) | 19 (22.9%) | 0.216 |
| Cold | 18 (18.8%) | 24 (28.6%) | 0.120 |
| Noise | 16 (18.7%) | 19 (22.6%) | 0.314 |
| **Medication** | | | |
| Skipping medication | 19 (19.8%) | 22 (26.2%) | 0.636 |
| Taking hypnotics | 11 (11.5%) | 13 (15.5%) | 0.429 |

**Supplementary Table 2. Correlations between the top 5 precipitating factors for DEBs and clinical and polysomnographic variables**

|  | **Correlation coefficienta** | | | | |
| --- | --- | --- | --- | --- | --- |
|  | **Stress** | **Anxiety** | **Anger** | **Fatigue** | **Watching TV** |
| **Clinical variables** | | | | | |
| Age, years | -0.117 | -0.114 | -0.010 | 0.002 | 0.094 |
| RBD duration, years | 0.043 | 0.085 | 0.000 | -0.104 | 0.000 |
| Educational level, years | -0.112 | 0.164 | 0.193 | -0.029 | 0.120 |
| GDS-K | **0.230*** | 0.181 | 0.156 | 0.014 | 0.054 |
| MoCA-K score | 0.019 | 0.093 | 0.112 | -0.144 | -0.129 |
| RBDQ-KR score | 0.138 | 0.195 | -0.094 | 0.068 | 0.047 |
| **Polysomnographic variables** | | | | | |
| Time in bed, min | -0.018 | -0.025 | 0.032 | 0.038 | -0.021 |
| Total sleep time, min | 0.039 | -0.012 | -0.103 | 0.016 | 0.052 |
| Wake after sleep onset, min | -0.019 | 0.056 | 0.114 | 0.057 | -0.096 |
| Sleep efficiency, % | 0.019 | -0.017 | -0.187 | -0.028 | 0.044 |
| Sleep latency, min | 0.019 | -0.039 | 0.157 | -0.011 | 0.014 |
| REM sleep latency, min | -0.009 | 0.007 | 0.064 | -0.042 | -0.010 |
| N1 sleep, % | -0.079 | -0.090 | -0.093 | 0.048 | 0.016 |
| N2 sleep, % | 0.082 | -0.158 | 0.106 | -0.058 | -0.075 |
| N3 sleep, % | 0.033 | -0.023 | -0.026 | 0.034 | 0.059 |
| REM sleep, % | 0.018 | 0.032 | -0.048 | 0.096 | 0.148 |
| AHI, events/hour | -0.087 | -0.191 | 0.029 | 0.018 | -0.008 |
| Arousal index, events/hour | 0.097 | 0.017 | 0.152 | 0.076 | -0.011 |

aPoint Biserial correlation coefficient.

**P* value<0.05.

Abbreviations: AHI=apnea-hypopnea index; GDS-K=Korean version of the Geriatric depression scale; MoCA-K=Korean version of the Montreal Cognitive Assessment; RBDQ-KR= Korean version of the REM Sleep Behavior Disorder Questionnaire-Hong Kong.

**Supplementary Table 3. Comparison of precipitating factors on DEBs according to RBD symptom severity**

| **Variables** | **RBDQ-KR≥50**  **(n=36)** | **RBDQ-KR<50**  **(n=60)** | ***P* value** |
| --- | --- | --- | --- |
| **Emotion and feelings** | | | |
| Stress | 24 (66.7%) | 35 (58.3%) | 0.417 |
| Anger | 23 (63.9%) | 26 (43.3%) | 0.051 |
| Anxiety | 18 (50.0%) | 36 (60.0%) | 0.339 |
| Depressive mood | 16 (44.4%) | 18 (30.0%) | 0.152 |
| Fatigue | 22 (61.1%) | 25 (41.7%) | 0.065 |
| Pain | 11 (30.6%) | 16 (26.7%) | 0.682 |
| **Food** | | | |
| Alcohol | 9 (25.0%) | 13 (21.7%) | 0.707 |
| Caffeine | 9 (25.0%) | 16 (26.7%) | 0.857 |
| Overeating in the evening | 6 (16.7%) | 13 (21.7%) | 0.552 |
| Fasting/Hunger | 9 (25.0%) | 7 (11.7%) | 0.090 |
| **Activities and sleep patterns** | | | |
| Strenuous exercise | 8 (22.2%) | 10 (16.7%) | 0.500 |
| Sex before bed | 3 (8.3%) | 6 (10.0%) | 1.000 |
| Conflict/fight | 15 (41.7%) | 19 (31.7%) | 0.321 |
| Sleep deprivation | 12 (33.3%) | 16 (26.7%) | 0.487 |
| Oversleeping | 4 (11.1%) | 8 (13.3%) | 0.750 |
| Sleeping away from home | 10 (27.8%) | 19 (31.7%) | 0.688 |
| Watching TV before bed | 18 (50.0%) | 26 (43.3%) | 0.526 |
| **Weather or environmental factor** | | | |
| Cloudy or rainy weather | 8 (22.2%) | 9 (15.0%) | 0.369 |
| Heat | 5 (13.9%) | 10 (16.7%) | 0.717 |
| Cold | 6 (16.7%) | 12 (20.0%) | 0.685 |
| Noise | 4 (11.1%) | 12 (20.0%) | 0.258 |
| **Medication** | | | |
| Skipping medication | 8 (22.2%) | 11 (18.3%) | 0.643 |
| Taking hypnotics | 5 (13.9%) | 6 (10.0%) | 0.562 |

Abbreviations: RBDQ-KR= Korean version of the REM Sleep Behavior Disorder Questionnaire-Hong Kong.

**Supplementary Table 4. Comparison of precipitating factors on DEBs according to obstructive sleep apnea severity**

| **Variables** | **AHI≥15**  **(n=35)** | **AHI<15**  **(n=61)** | ***P* value** |
| --- | --- | --- | --- |
| **Emotion and feelings** | | | |
| Stress | 21 (60.0%) | 38 (62.3%) | 0.824 |
| Anger | 13 (37.1%) | 35 (57.4%) | 0.056 |
| Anxiety | 23 (65.7%) | 31 (50.8%) | 0.157 |
| Depressive mood | 14 (40.0%) | 20 (32.8%) | 0.477 |
| Fatigue | 18 (51.4%) | 29 (47.5%) | 0.714 |
| Pain | 12 (34.3%) | 15 (24.6%) | 0.309 |
| **Food** | | | |
| Alcohol | 10 (28.6%) | 12 (19.7%) | 0.318 |
| Caffeine | 11 (31.4%) | 14 (23.0%) | 0.362 |
| Overeating in the evening | 10 (28.6%) | 9 (14.8%) | 0.102 |
| Fasting/Hunger | 7 (20.0%) | 9 (14.8%) | 0.507 |
| **Activities and sleep patterns** | | | |
| Strenuous exercise | 10 (28.5%) | 8 (13.1%) | 0.062 |
| Sex before bed | 4 (11.4%) | 5 (8.2%) | 0.720 |
| Conflict/fight | 12 (34.3%) | 22 (36.1%) | 0.861 |
| Sleep deprivation | 10 (28.6%) | 18 (29.5%) | 0.923 |
| Oversleeping | 4 (11.4%) | 8 (13.1%) | 0.100 |
| Sleeping away from home | 11 (31.4%) | 18 (29.5%) | 0.844 |
| Watching TV before bed | 17 (48.6%) | 27 (44.3%) | 0.683 |
| **Weather or environmental factor** | | | |
| Cloudy or rainy weather | 4 (11.4%) | 13 (21.3%) | 0.275 |
| Heat | 4 (11.4%) | 11 (18.0%) | 0.561 |
| Cold | 7 (20.0%) | 11 (18.0%) | 0.812 |
| Noise | 7 (20.0%) | 9 (14.8%) | 0.507 |
| **Medication** | | | |
| Skipping medication | 6 (17.1%) | 13 (21.3%) | 0.622 |
| Taking hypnotics | 3 (8.6%) | 8 (13.1%) | 0.741 |

Abbreviations: AHI=apnea-hypopnea index.
